# Supplementary material
Source: PubMed Central journal article supplement (PMC3678557)

Figure S2. rev3-L979F

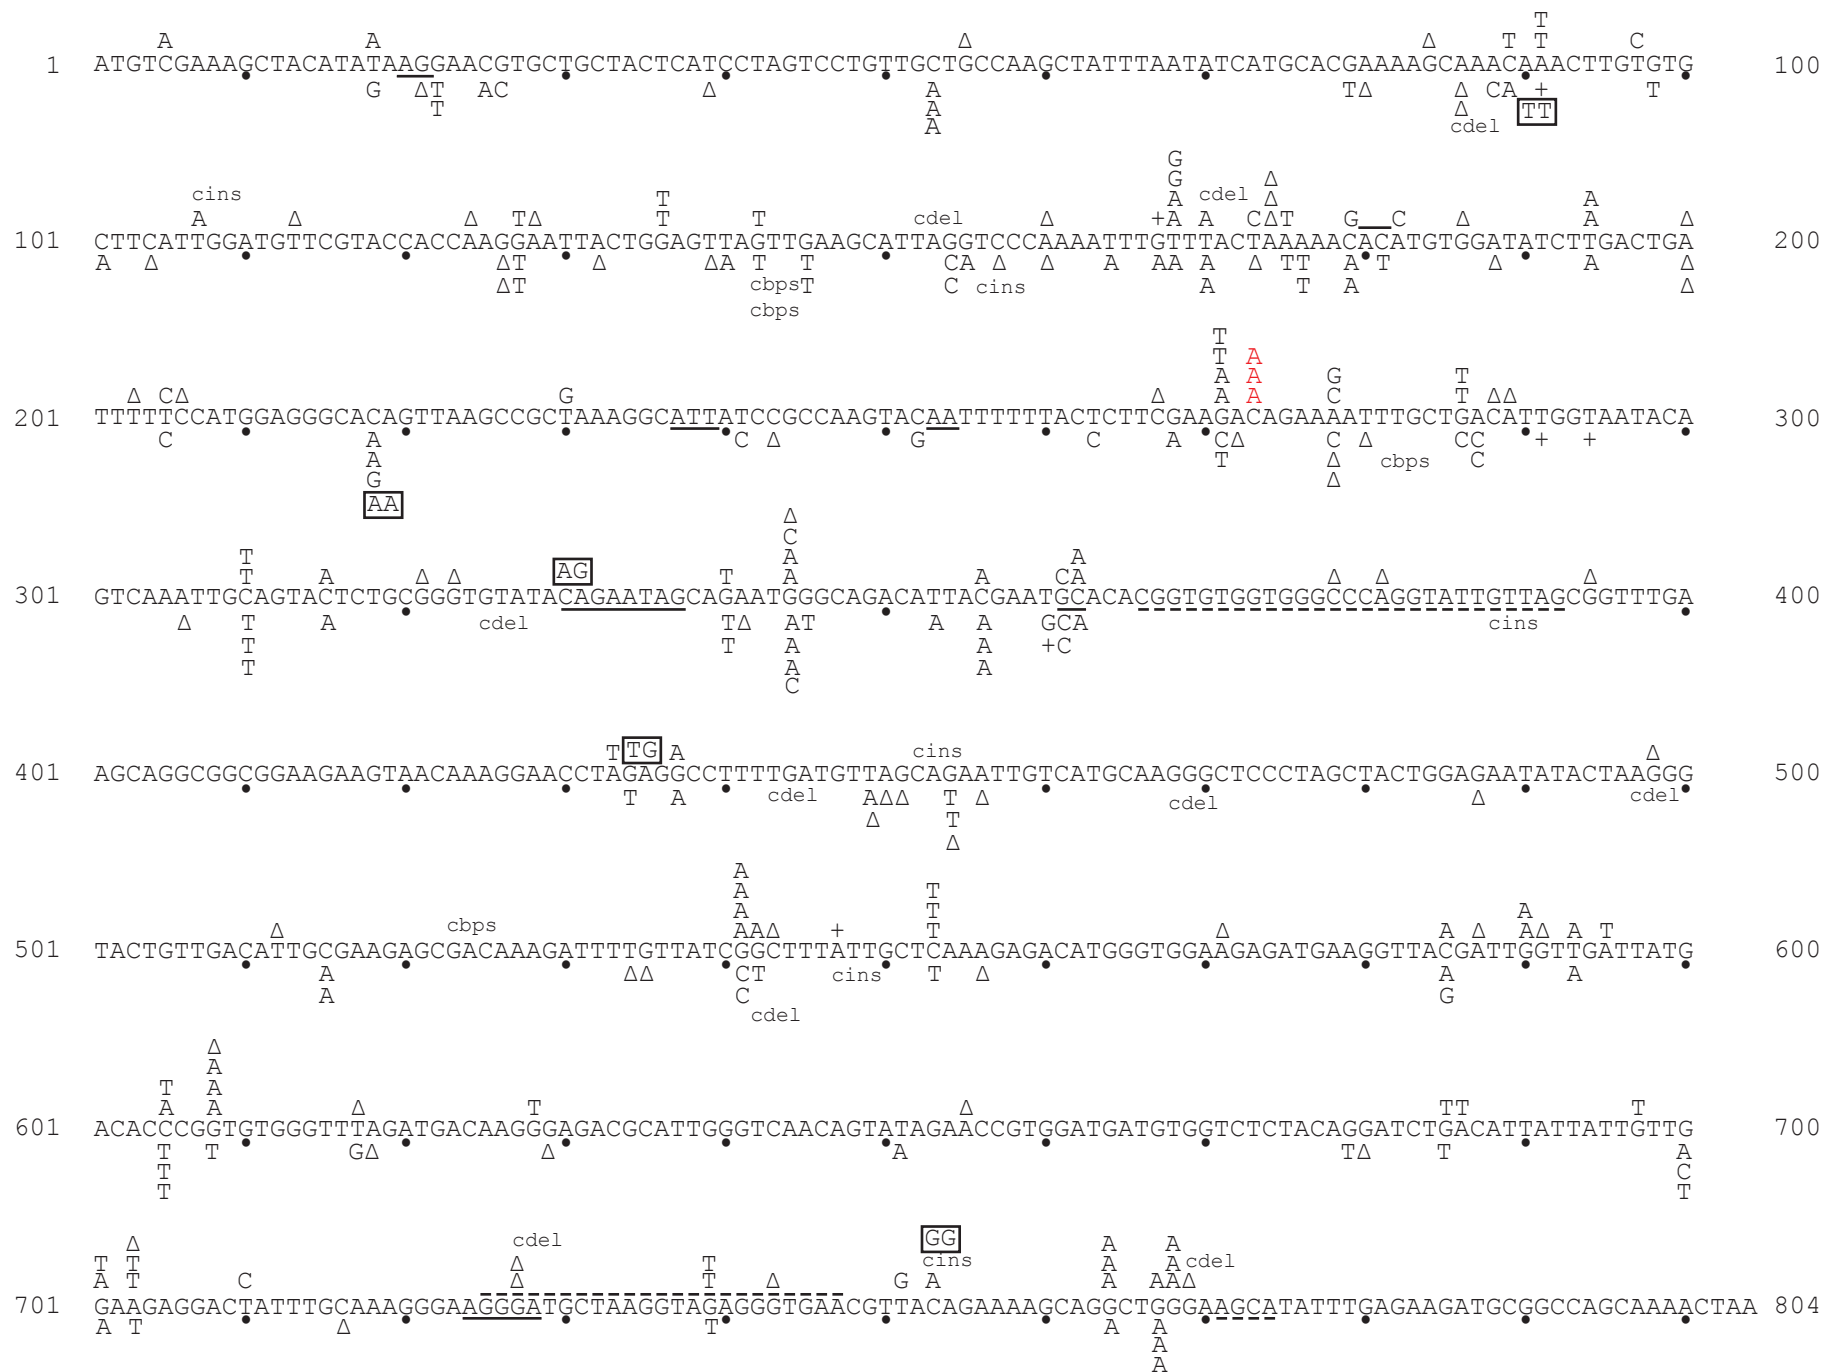

Figure S3. *rad30Δ rev3-L979F*

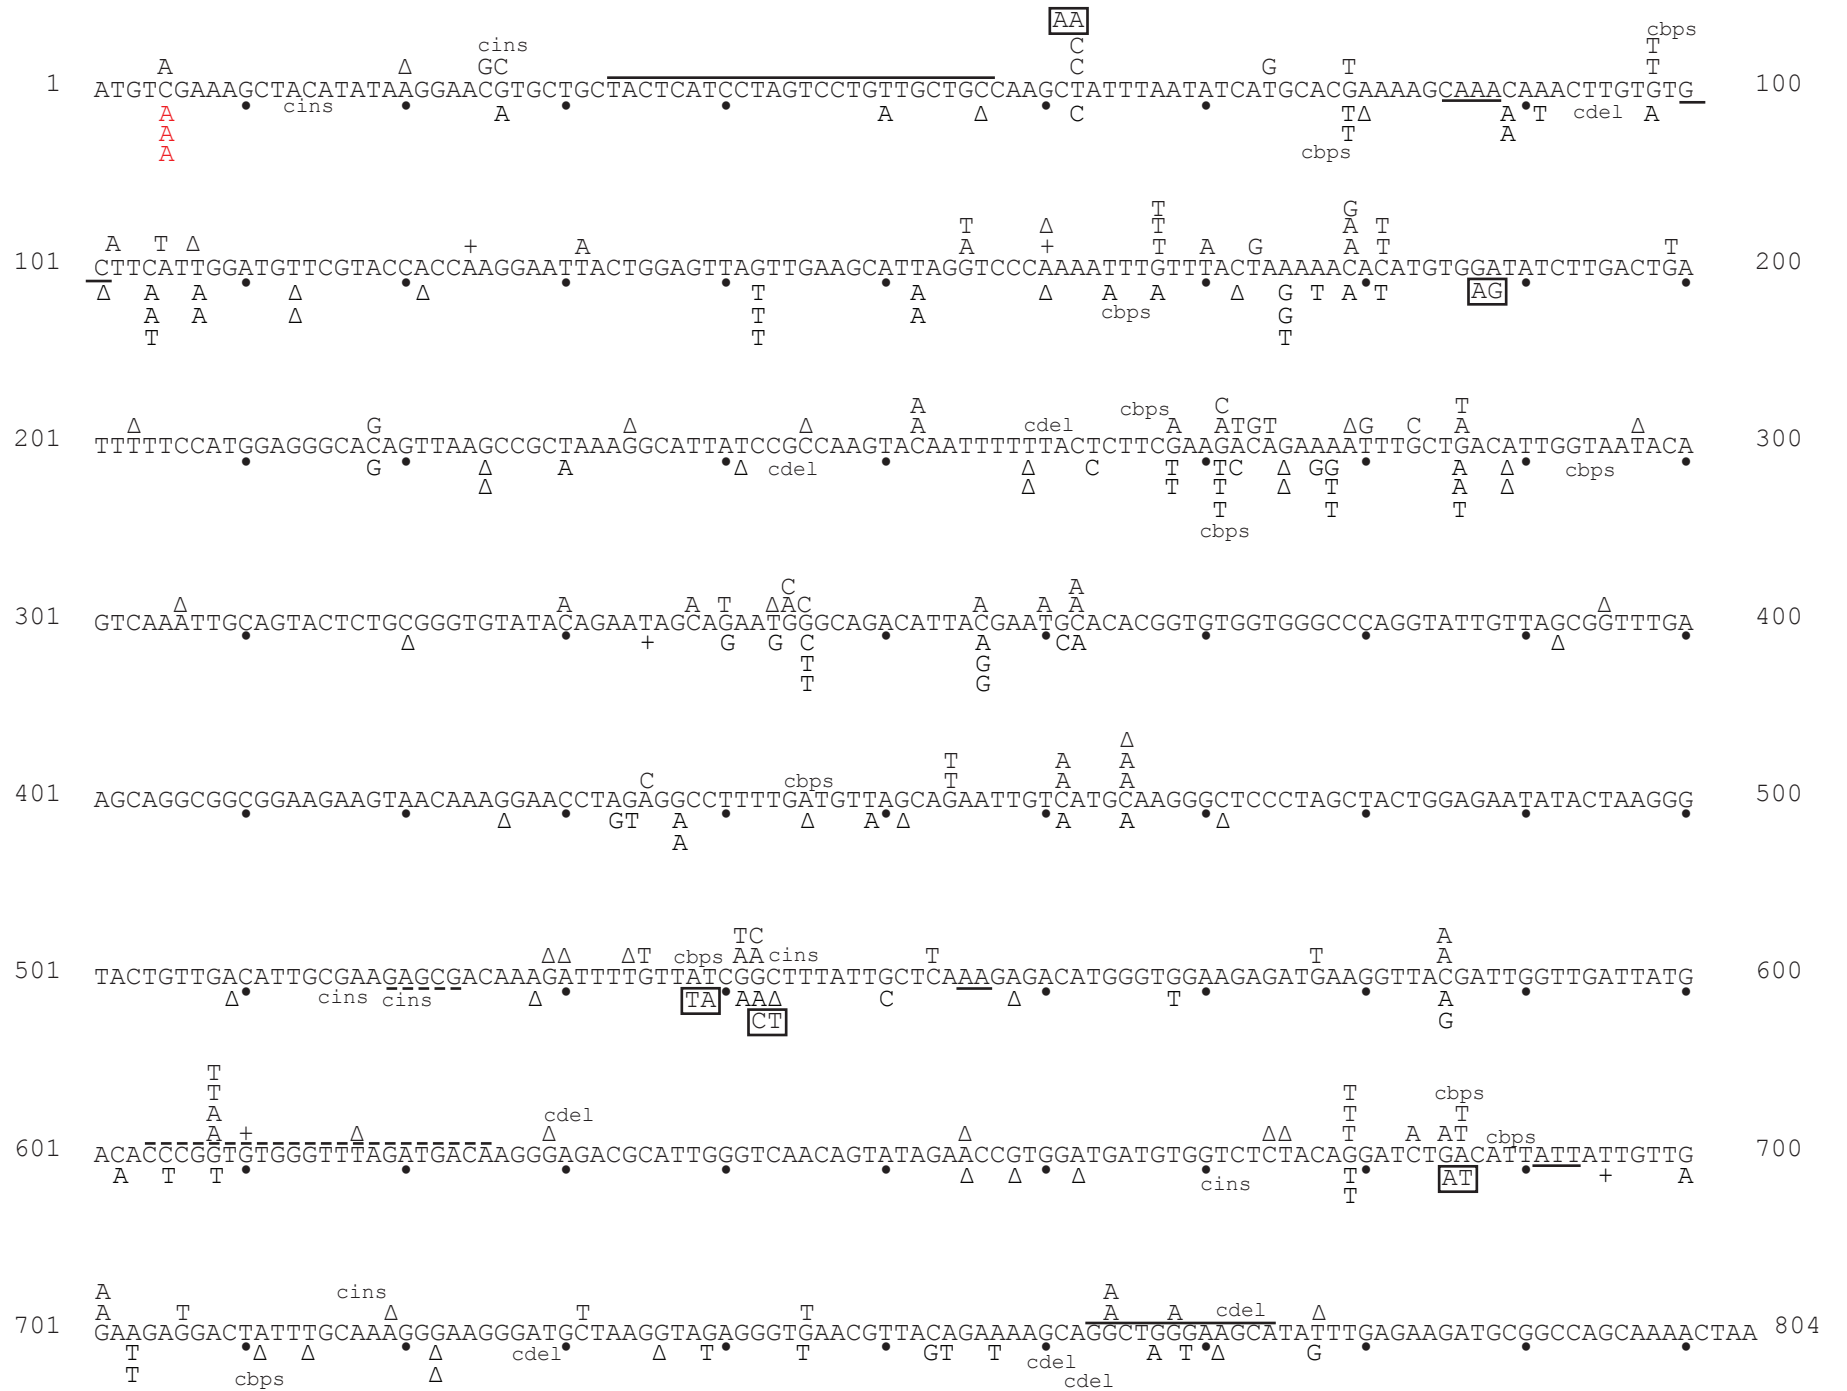

Figure S4. *rad14Δ*

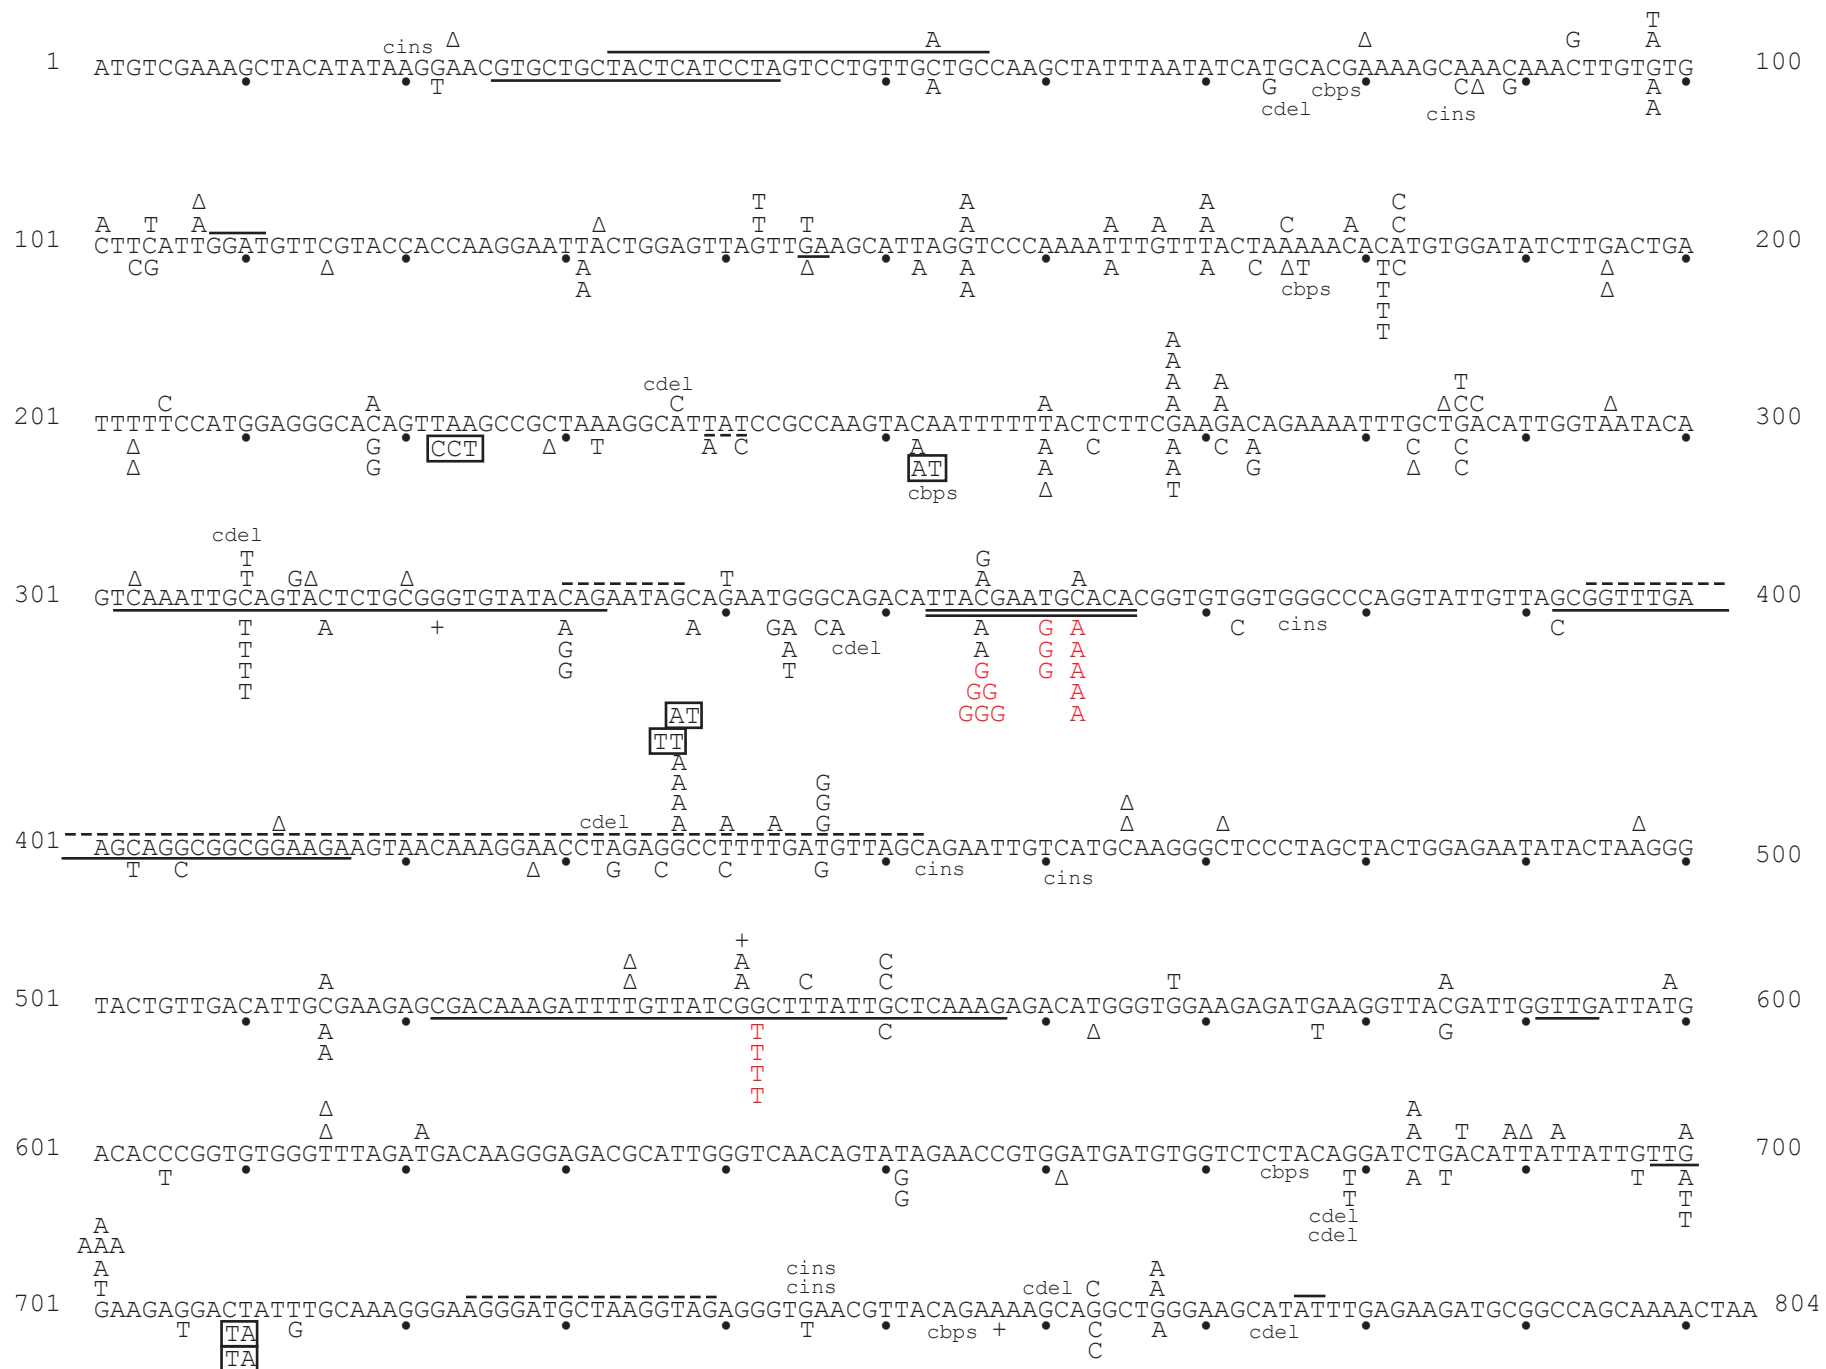

Figure S5. *rad14Δ rev3-L979F*

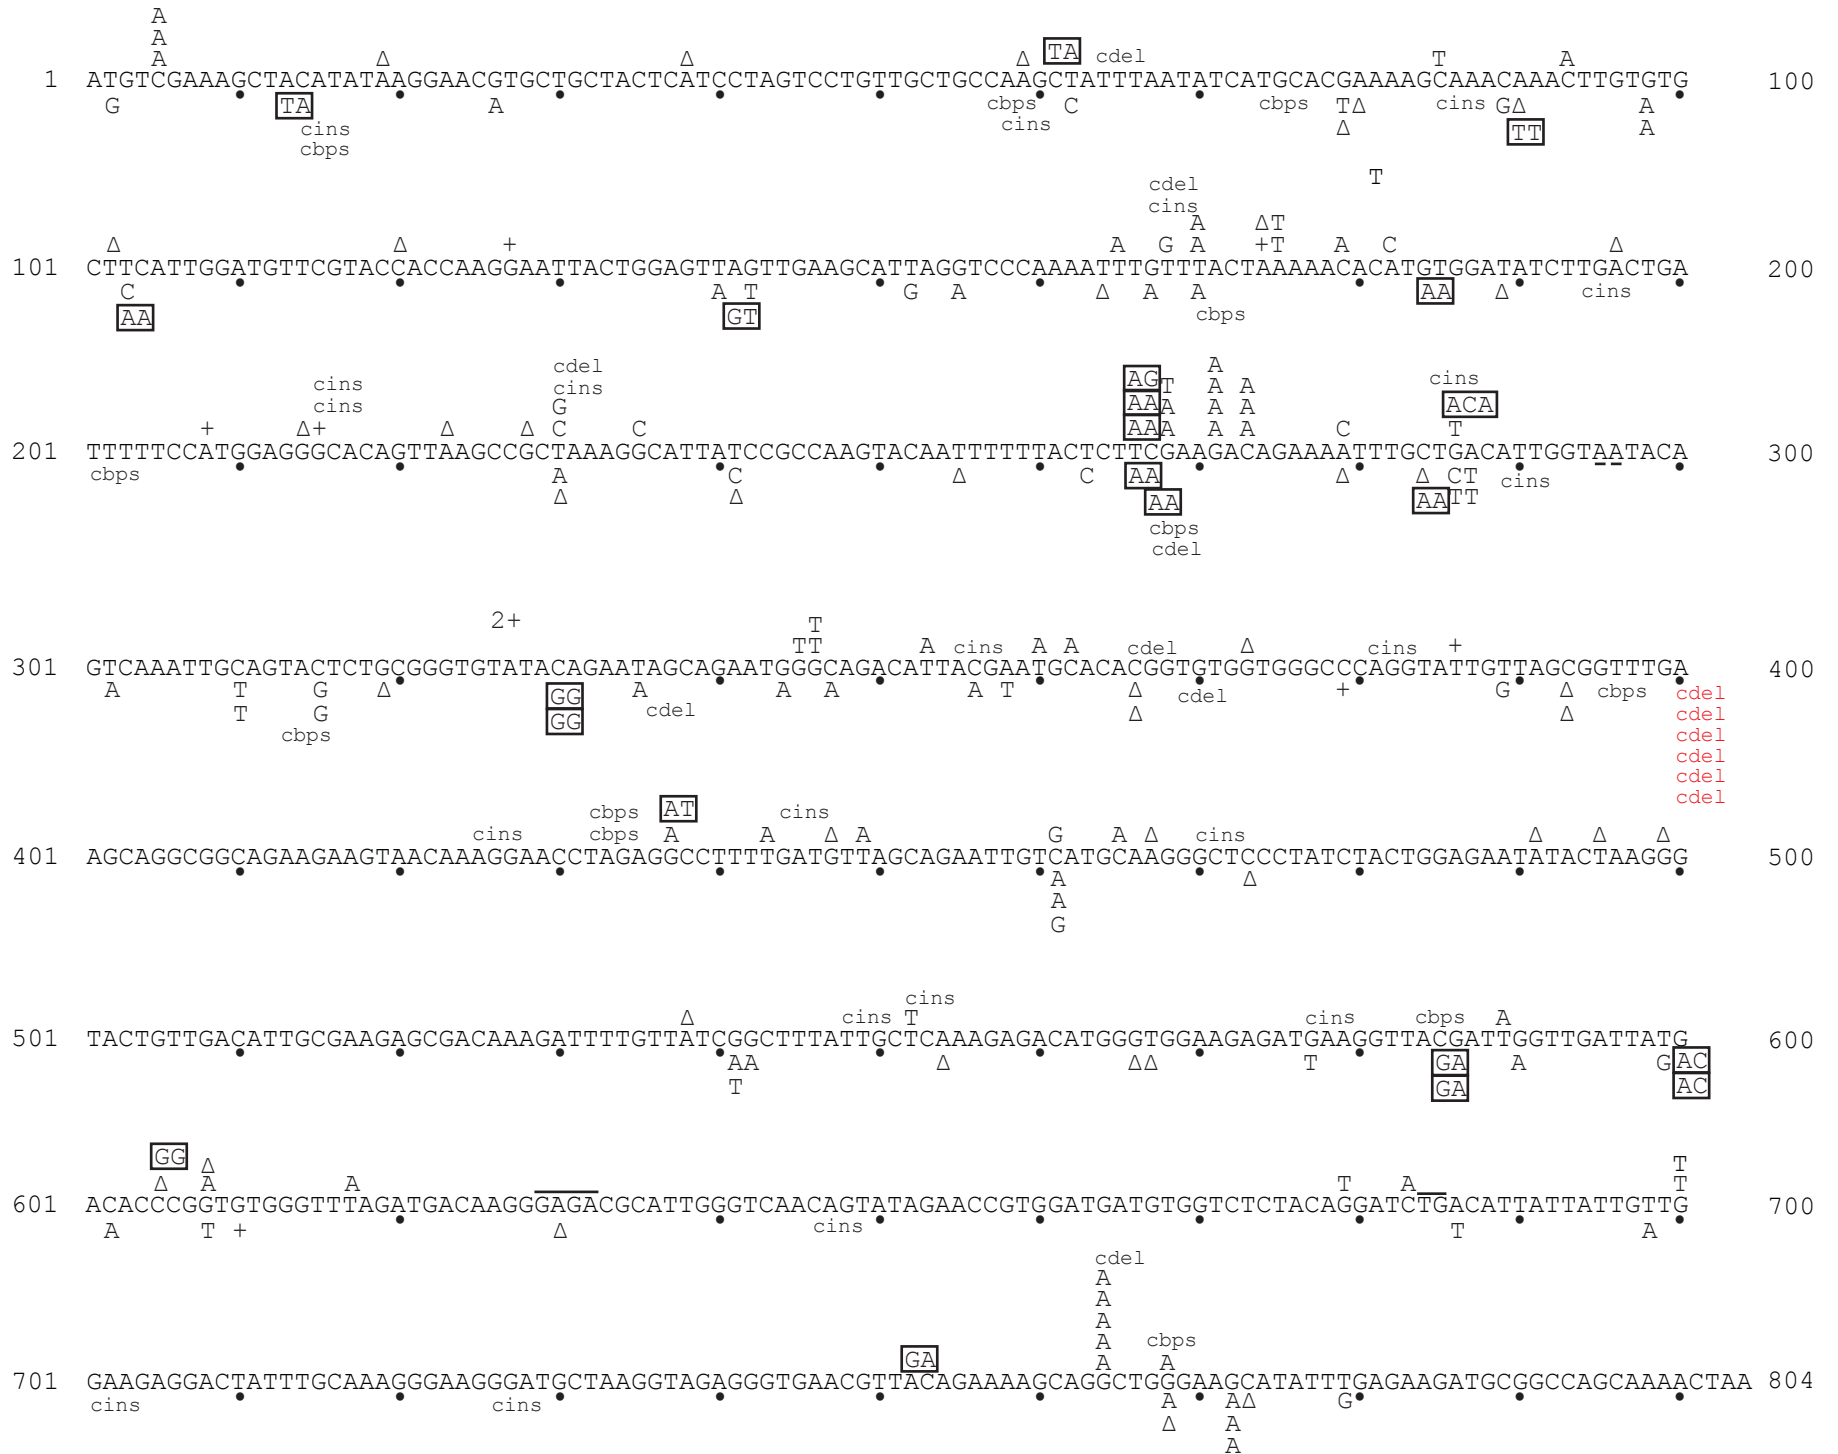



Figure S7.

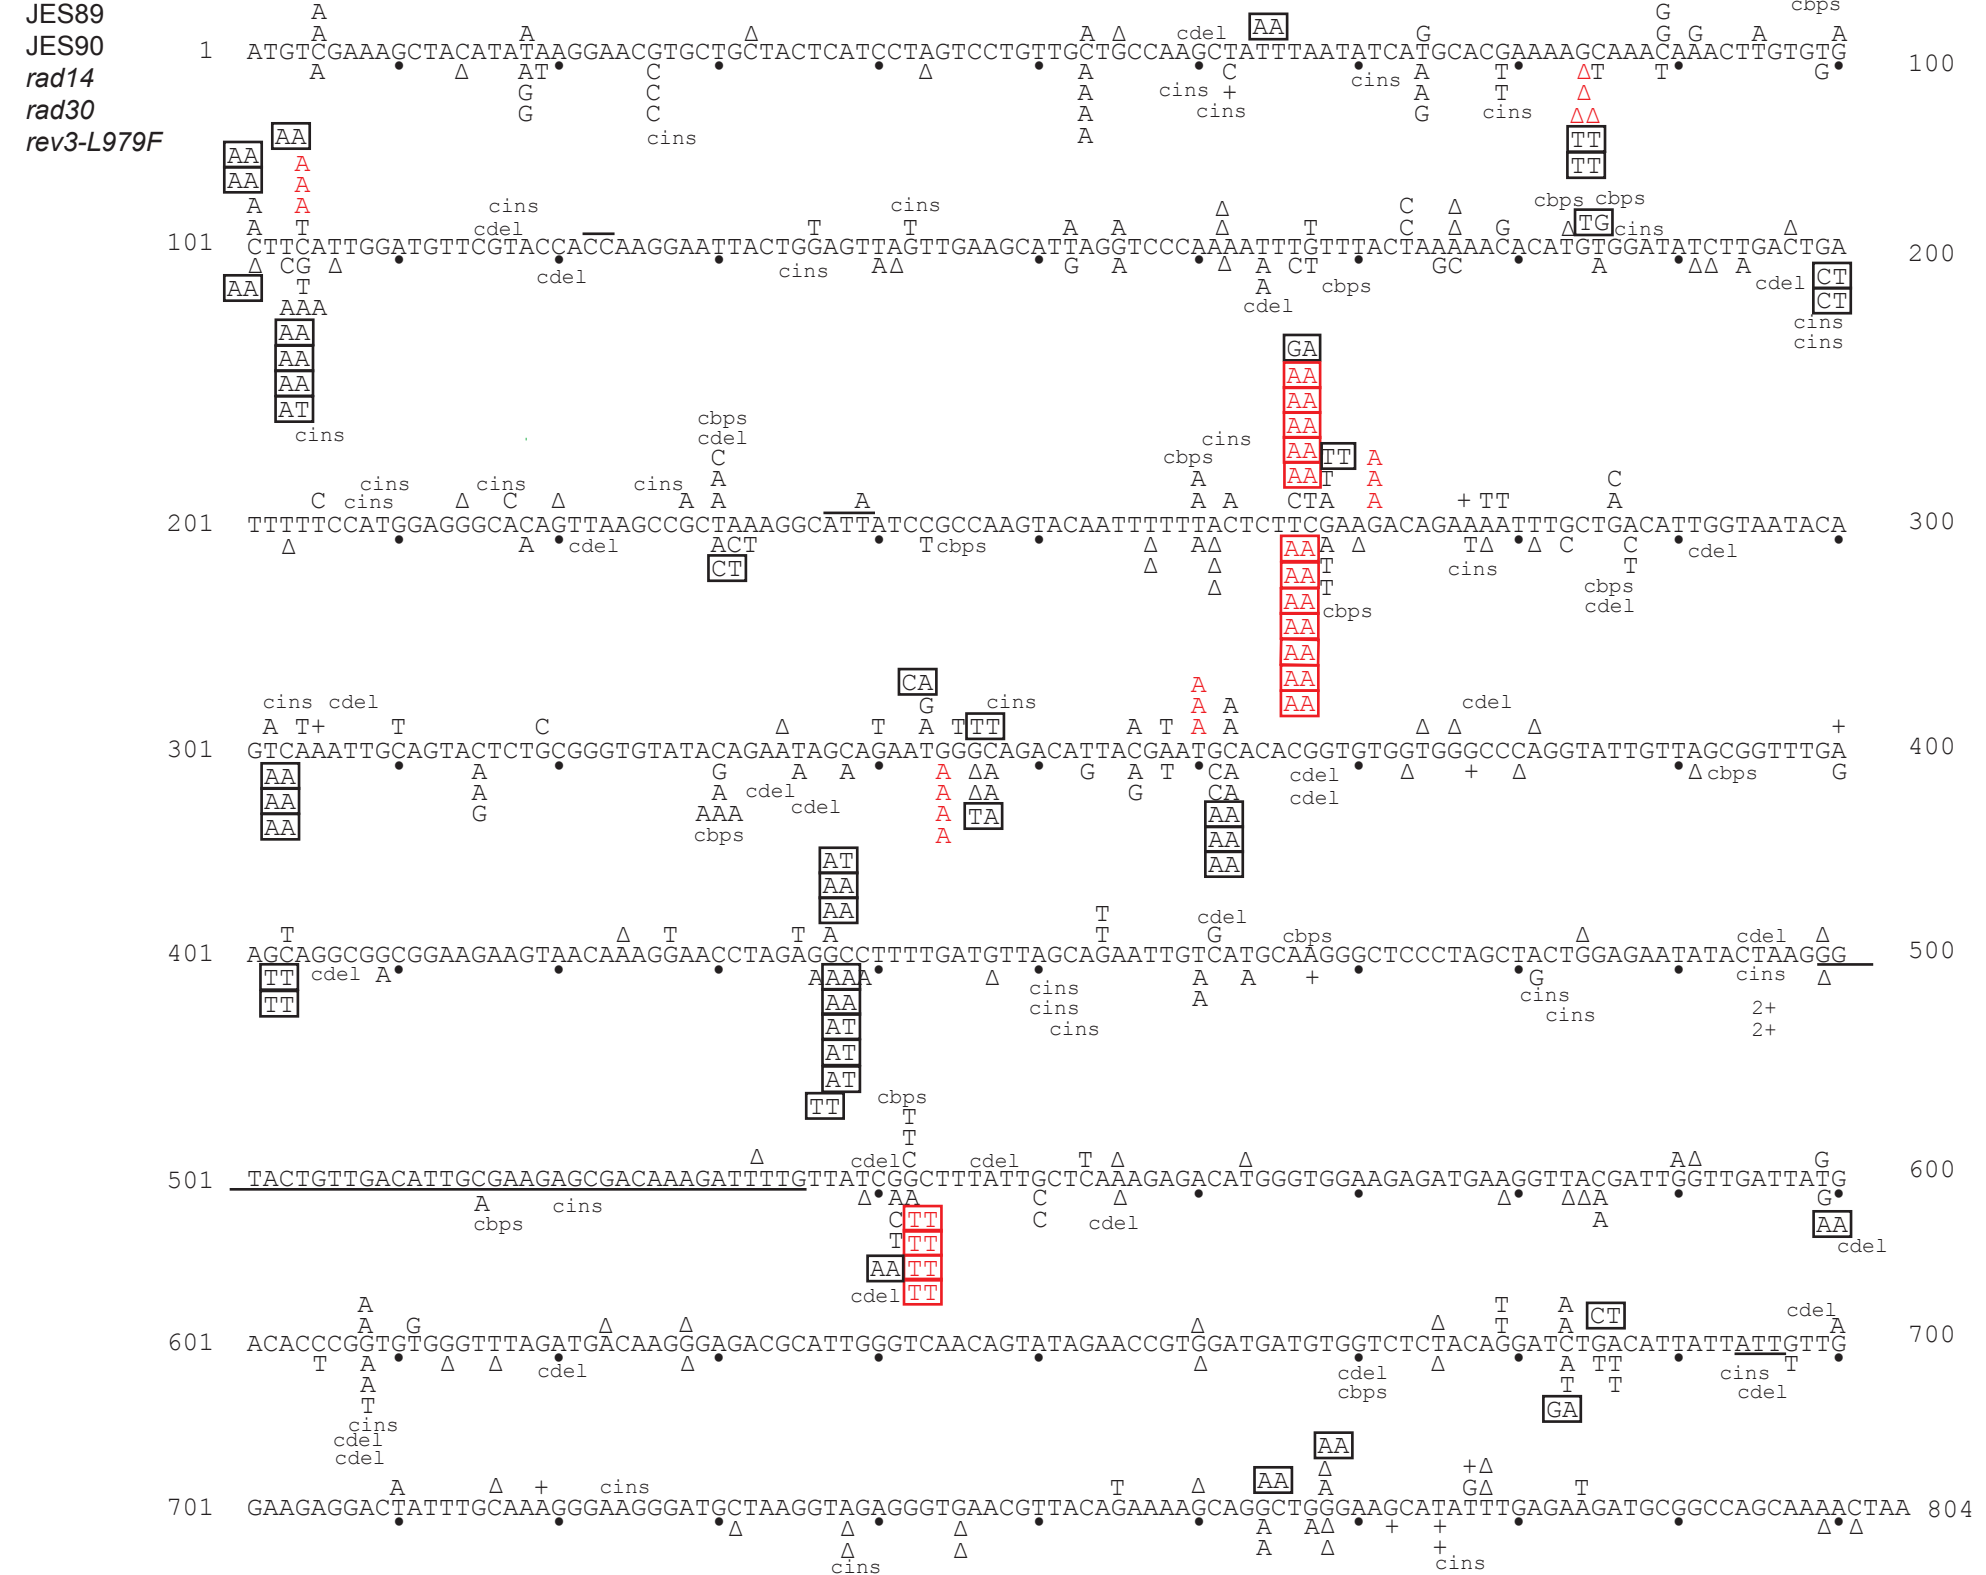

Figure S8. *rad14Δ rev3Δ*

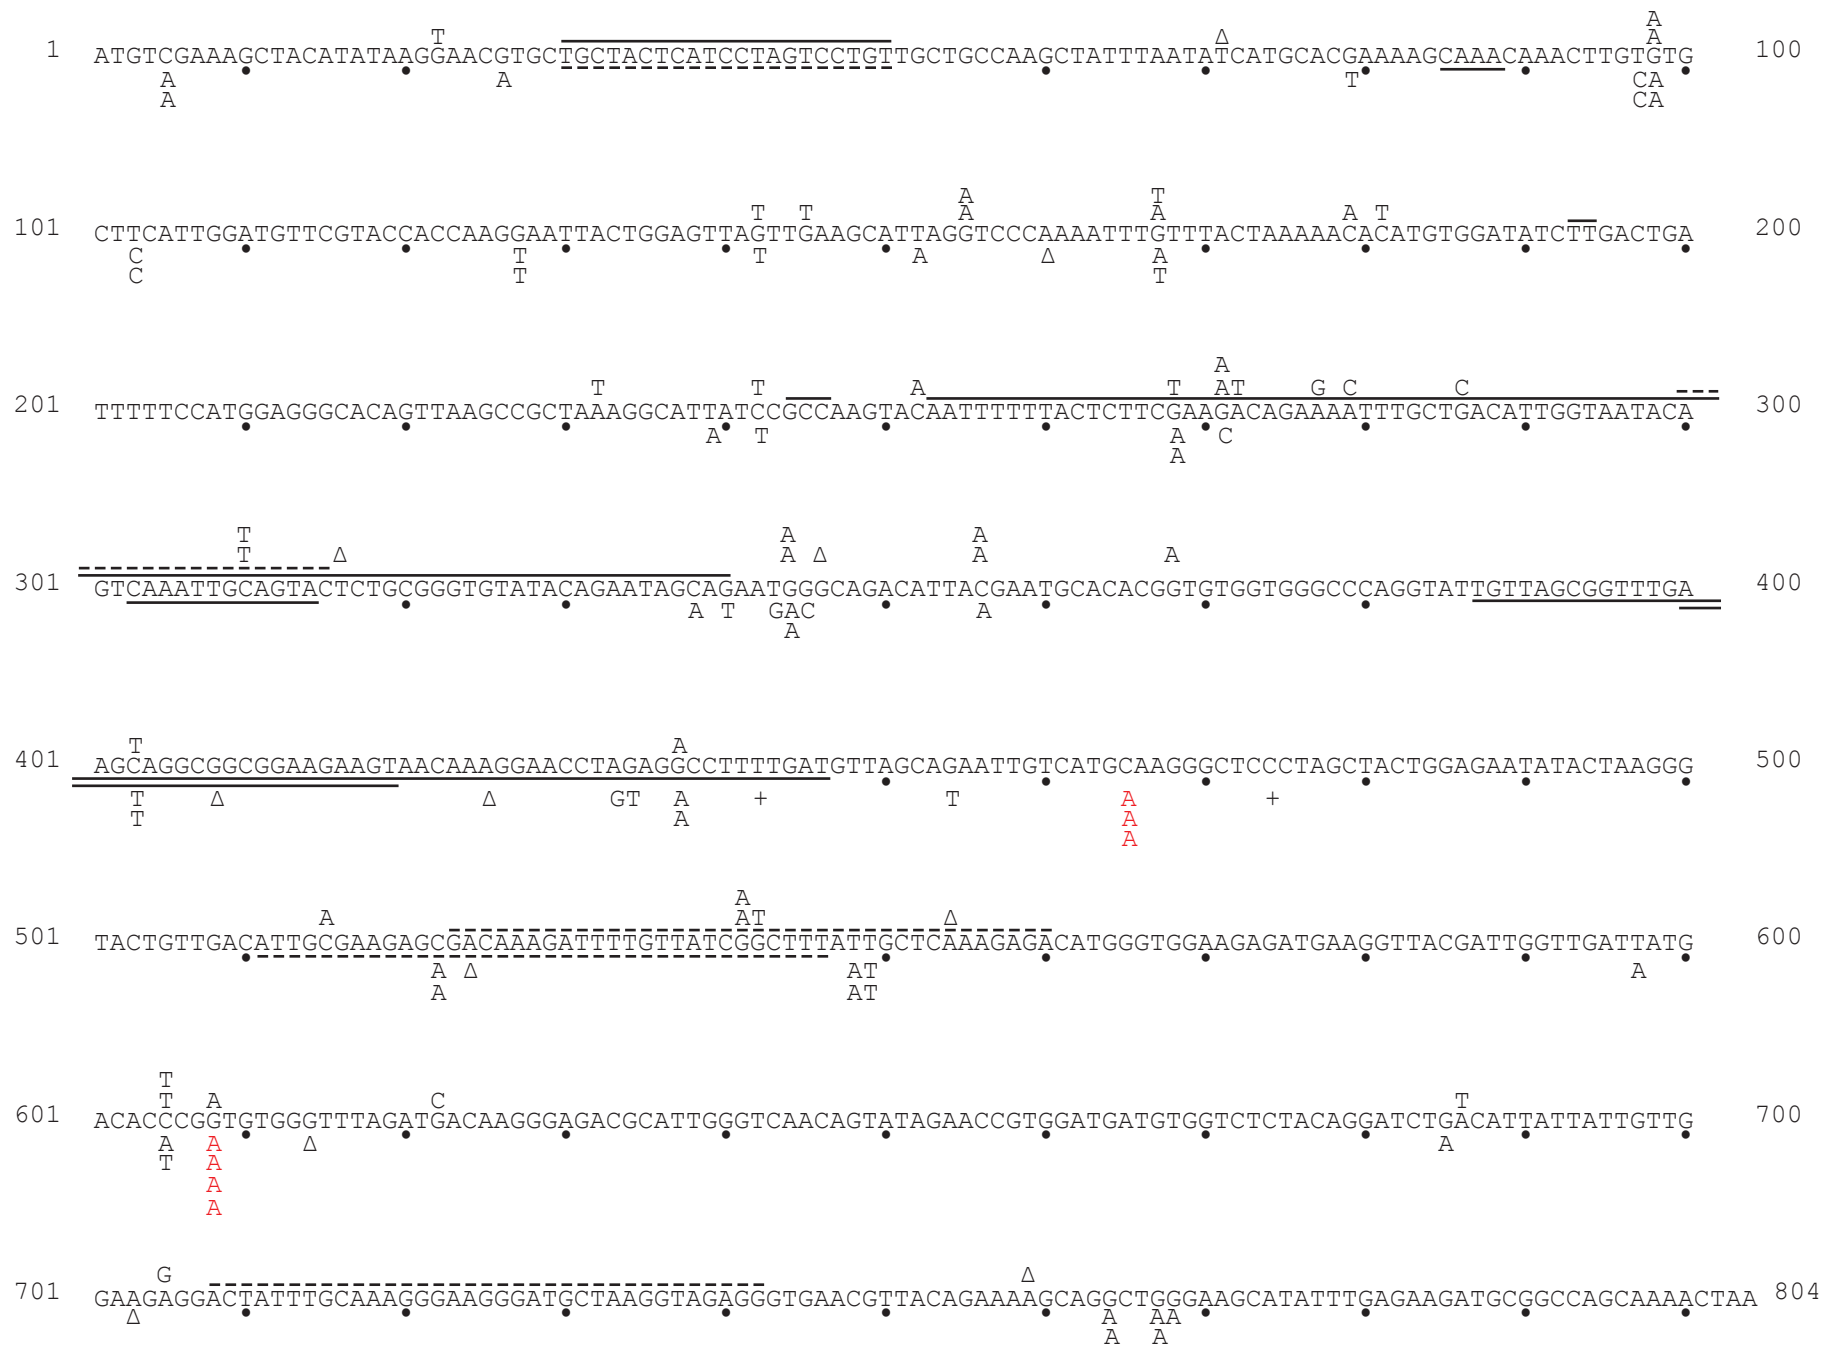

Supplement: NIHMS462747-supplement-supp_figures.pdf [file NIHMS462747-supplement-supp_figures.pdf]
